# Supplementary material for: Structural definition of a pan-sarbecovirus neutralizing epitope on the spike S2 subunit
Source: PubMed Central journal article supplement (PMC9001700; doi:10.1038/s42003-022-03262-7), 2022-04-11
Supplement: 42003_2022_3262_MOESM3_ESM.pdf [file 42003_2022_3262_MOESM3_ESM.pdf]

## Description of Additional Supplementary Files

**File name:** Supplementary Data 1

**Description:** Source data for Figure 1: Pseudovirus assay (unprocessed and normalized data).

**File name:** Supplementary Data 2

**Description:** Source Data for Figure 2: ELISA data for panels g and h (unprocessed and normalized data).

**File name:** Supplementary Data 3

**Description:** Source Data for Figure 5: ELISA data for panels a-d, cell surface-expressed spike staining for panels e-j, OC43 neutralization data for panels k and l, and MERS-CoV neutralization data for panel m (unprocessed and normalized data).
